# Supplementary material
Source: PubMed Central journal article supplement (PMC7459186)

Onsets of sleep

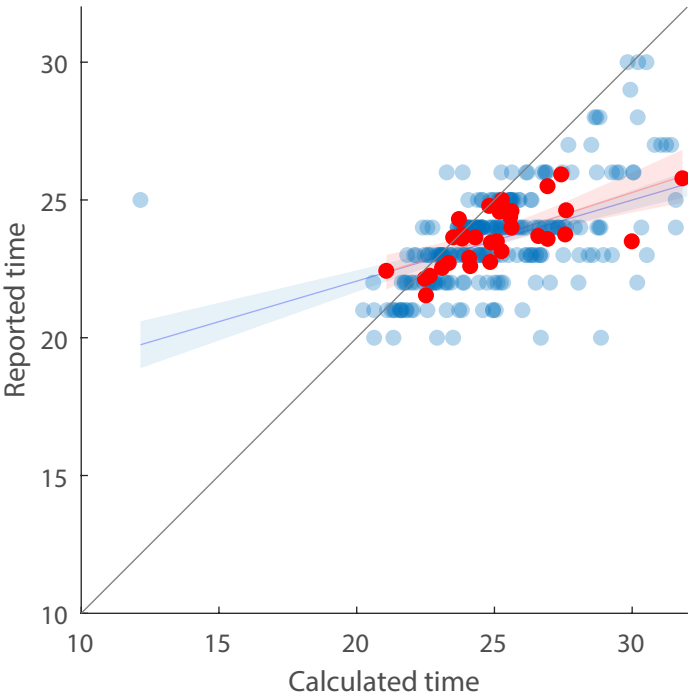

Offsets of sleep

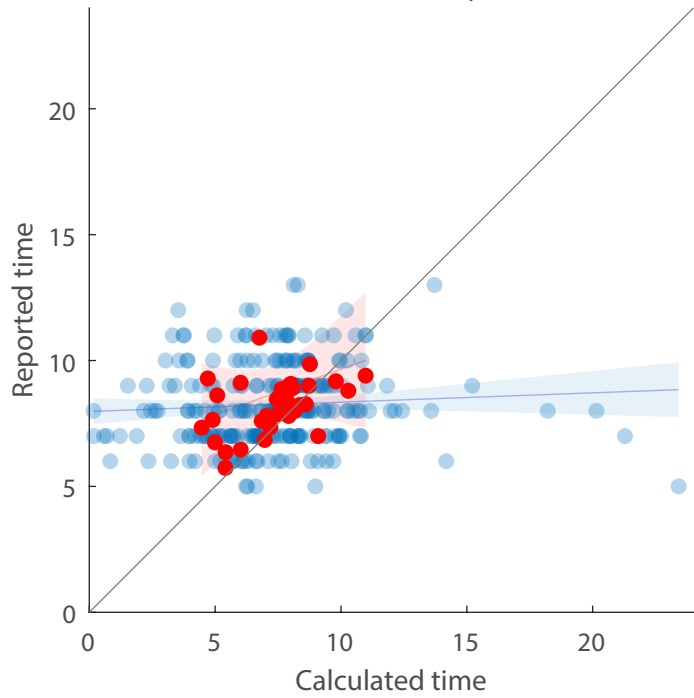

Supplement: kaaa012_suppl_supplementary-figure-2.pdf [file kaaa012_suppl_supplementary-figure-2.pdf]

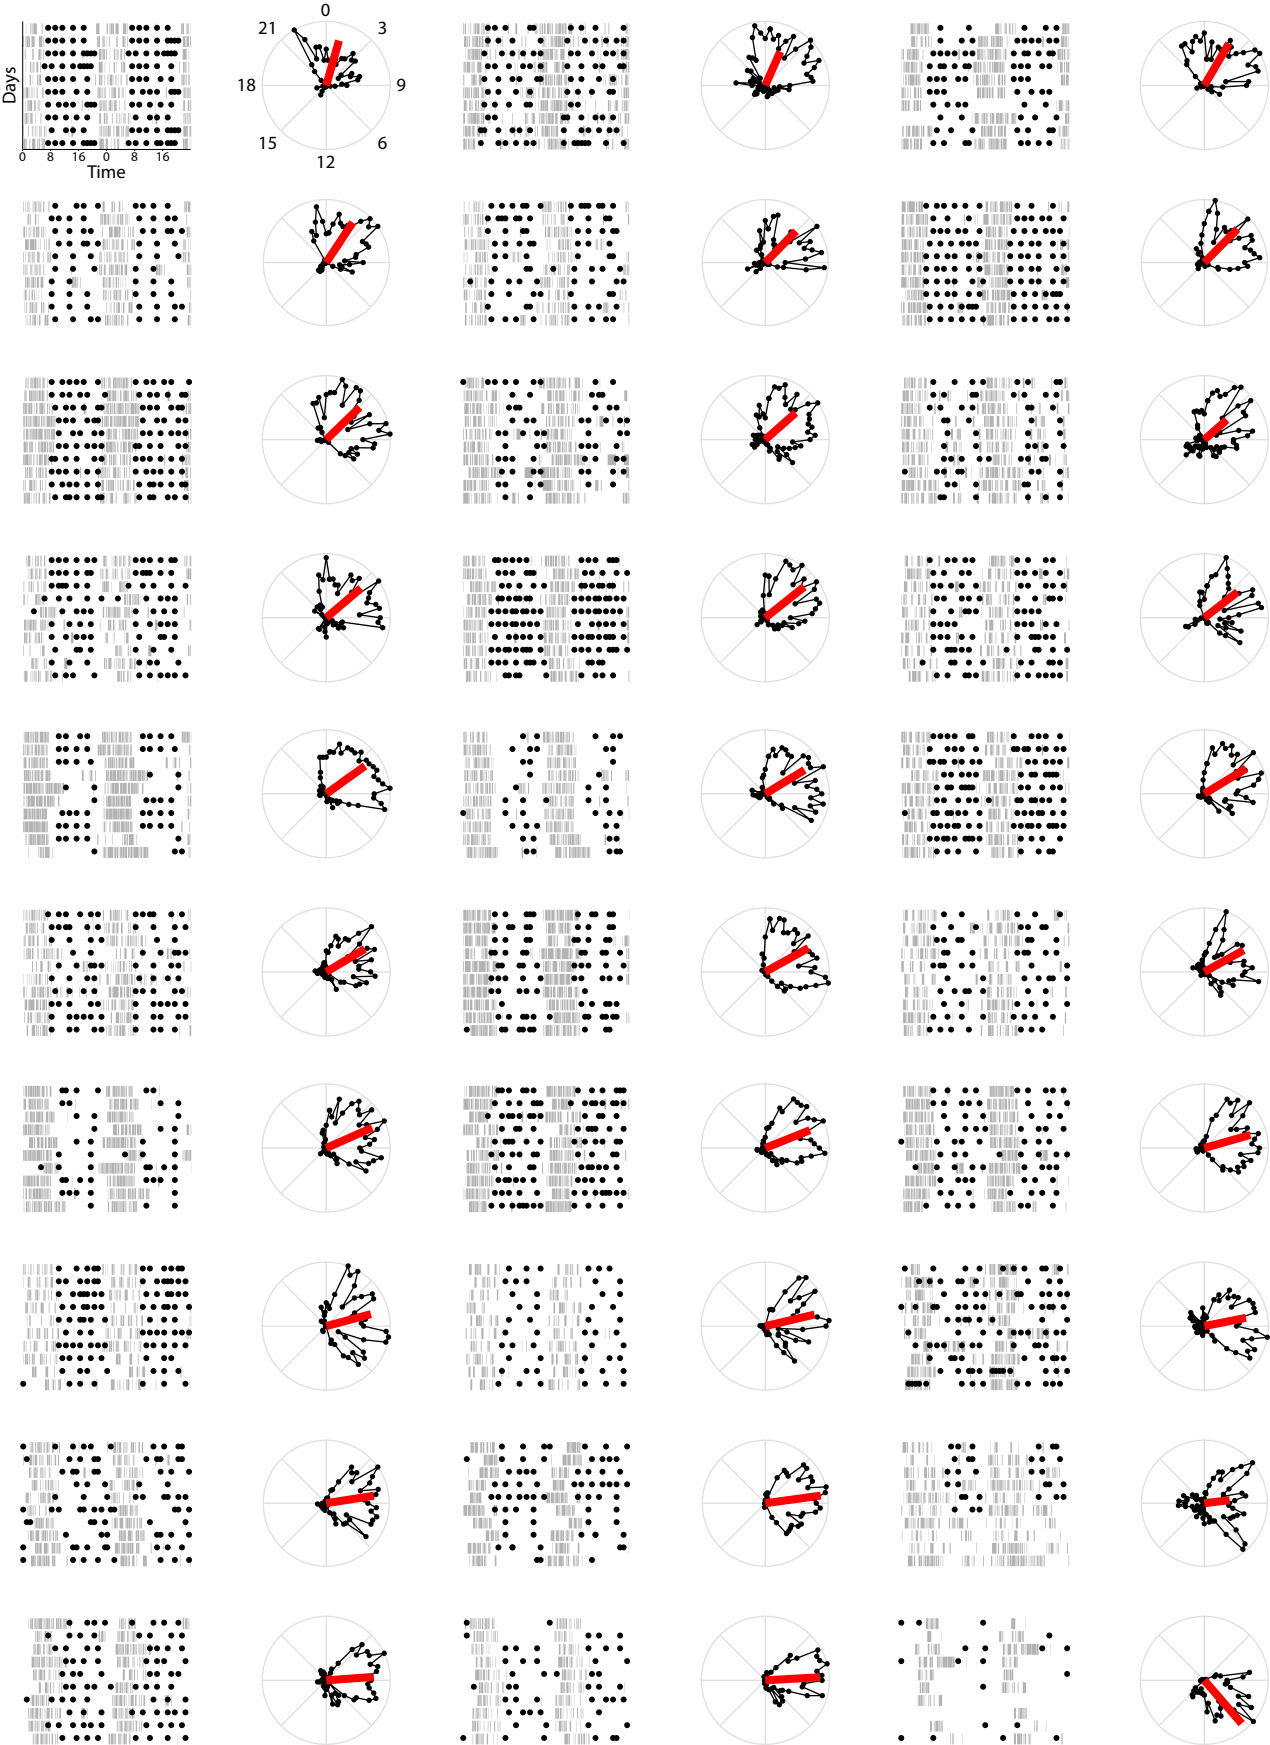

Supplement: kaaa012_suppl_supplementary-figure-3.pdf [file kaaa012_suppl_supplementary-figure-3.pdf]

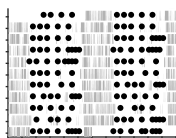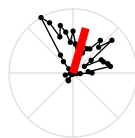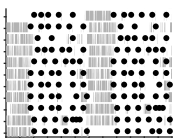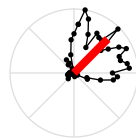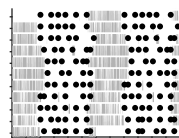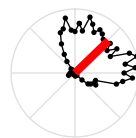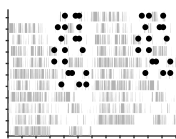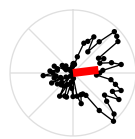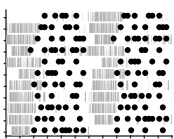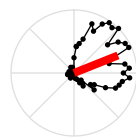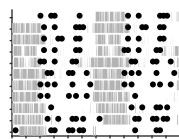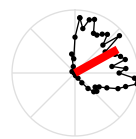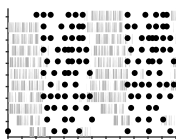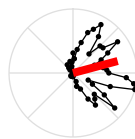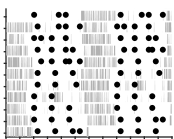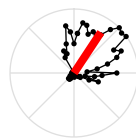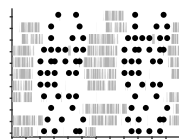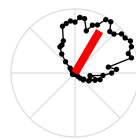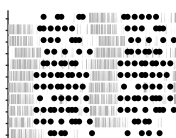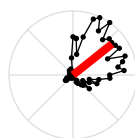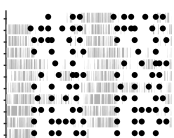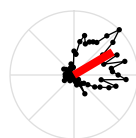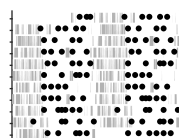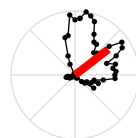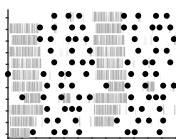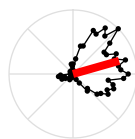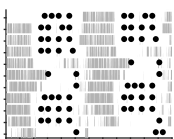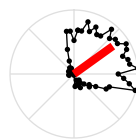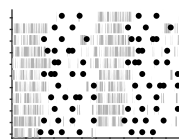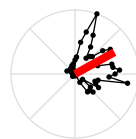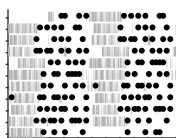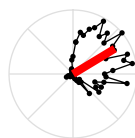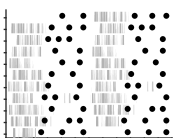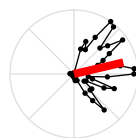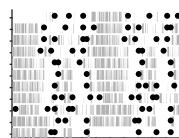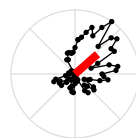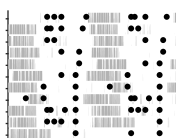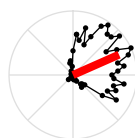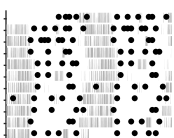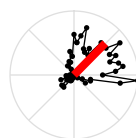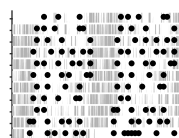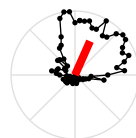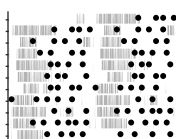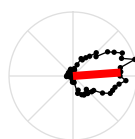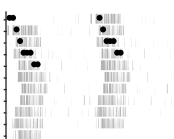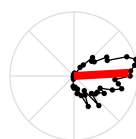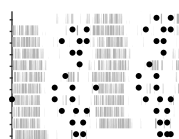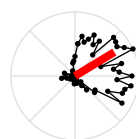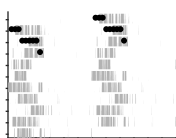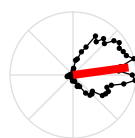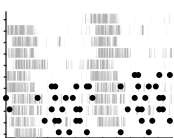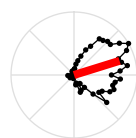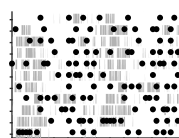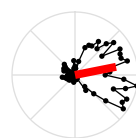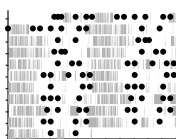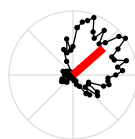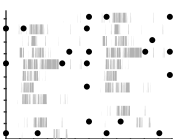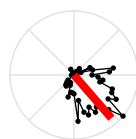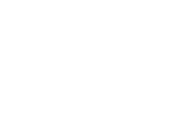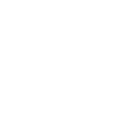

Supplement: kaaa012_suppl_supplementary-figure-4.pdf [file kaaa012_suppl_supplementary-figure-4.pdf]
